# Supplementary material for: Flame assisted chemical vapour deposition NiO hole transport layers for mesoporous carbon perovskite cells
Source: Royal Society of Chemistry journal article supplement (doi:10.1039/c9tc03922h), 2019-01-01
Supplement: c9tc03922h1.pdf [file c9tc03922h1.pdf]

### Flame Assisted Chemical Vapour Deposition NiO hole transport layers for mesoporous carbon perovskite cells

Heather M. Yates,<sup>a\*</sup> Simone M.P. Meroni,<sup>b</sup> Dimitrios Raptis,<sup>b</sup> John L. Hodgkinson<sup>a</sup> and Trystan M. Watson<sup>b</sup>

<sup>a</sup>Materials and Physics Research Centre, University of Salford, Manchester, M5 4WT, UK.

<sup>b</sup>SPECIFIC, Swansea University, Bay Campus, Fabian Way, Crymlyn Burrows, Swansea, SA1 8EN, Wales UK

a)

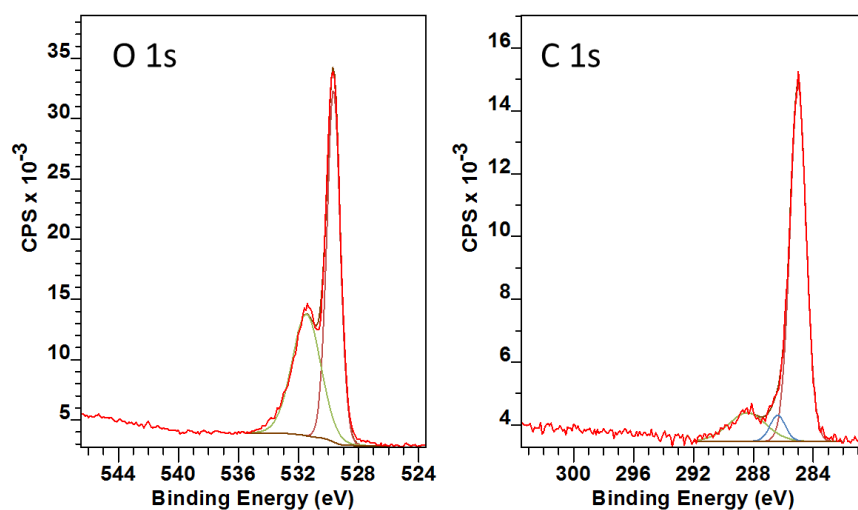

b)

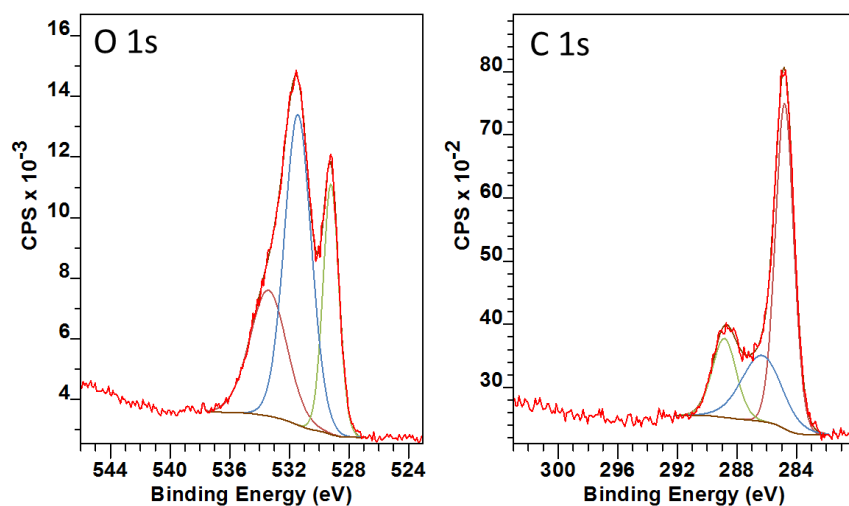

Fig. S1, XPS O 1s and C 1s spectra for NiO deposited under a) lean flame, b) standard flame

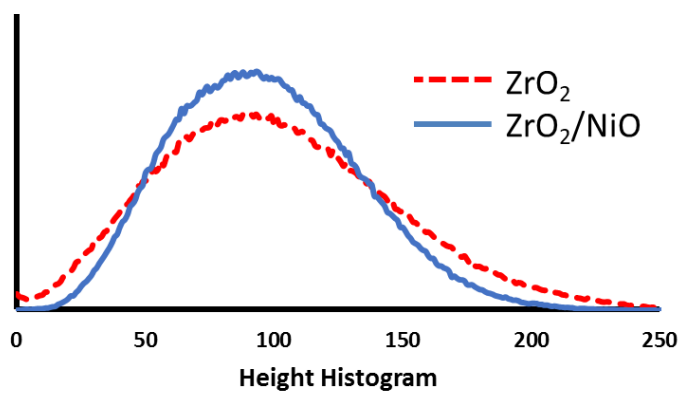

Fig. S2, Comparison of height histograms of  $ZrO_2$  with and without 50 passes NiO.
